1 **Title: Life histories decide reserve benefits in transient yields and bycatch**  
2 **persistence**

3 Renfei Chen<sup>1\*</sup>, Chengyi Tu<sup>2,3</sup>, Quan-Xing Liu<sup>4,5</sup>

4 <sup>1</sup>School of Life Science, Shanxi Normal University, Yaodu, Linfen, 041000, China.

5 <sup>2</sup>School of Ecology and Environmental Science, Yunnan University, 650091,

6 Kunming, China. <sup>3</sup>Department of Environmental Science, Policy, and Management,

7 University of California, Berkeley, California 94720, USA. <sup>4</sup>State Key Laboratory of

8 Estuarine and Coastal Research, School of Ecological and Environmental Sciences,

9 East China Normal University, Shanghai 200241, China. <sup>5</sup>Center for Global Change

10 and Ecological Forecasting, School of Ecological and Environmental Science, East

11 China Normal University, 200241 Shanghai, China.

12

13 \*Corresponding author: Renfei Chen. Email: [chenrf@sxnu.edu.cn](mailto:chenrf@sxnu.edu.cn)

14

15

16

17

18

19

20

21

22 **Abstract**

23 Recent research indicates that marine reserves can both improve fisheries yields of  
24 target species and maintain the persistence of bycatch species. However, the prevalent  
25 equilibrium analyses prevent our understandings in transient behavior at short-time  
26 scales. Here, we develop high dimensional theoretical frameworks by considering age  
27 structure to assess the relative advantages between reserve-only and no-reserve  
28 fisheries management strategies. Our results show that whether strategies with only  
29 reserves can achieve higher fisheries yields (measured by both weight and number)  
30 and maintain bycatch persistence depends on the life histories of both target and  
31 bycatch species through perspectives of transient oscillations. Our research has  
32 important practical applications especially for the West Coast groundfish fishery in  
33 the USA, as it suggests that reserves can perform benefits in both fisheries and  
34 conservation goals for target species with older ages at maturity and lower adult  
35 survivorship.

36

37 **Keywords:** Marine reserves, bycatch persistence, transients, life histories, fisheries  
38 yields

39

40

41

42

43

44

## 45 **Introduction**

46 A central problem in marine ecology is improving harvested yields in fisheries and  
47 maintaining species persistence and biodiversity in conservation. To meet these goals  
48 simultaneously, different fisheries strategic managements have been proposed (Game  
49 *et al.* 2009; Gaines *et al.* 2010; Cohen & Foale 2013; Chen *et al.* 2020). Among which  
50 the most influenced methods are traditional fixed/limitation harvesting strategies and  
51 relatively new proposed ones by designing marine reserves (Hastings & Botsford  
52 1999; Hastings *et al.* 2017; Hilborn 2017). The inevitable problem deserving attention  
53 is that which method can perform better to achieve higher fisheries yields, but without  
54 facing the risk of species extinction because of overfishing. A theoretical framework  
55 suggests that establishing marine reserves is a better choice by achieving equivalent  
56 fisheries yields with advantages in maintaining species persistence in comparison with  
57 traditional fisheries management by harvesting effort control each year (Hastings &  
58 Botsford 1999). However, the single species assumption prevents more general  
59 predictions in biodiversity such as considering the effect of some more easily extinct  
60 species relative to the target species in fisheries.

61

62 The incidental catch of unwanted species (i.e. the so-called "bycatch species") is  
63 ubiquitous and has been a great threat to fisheries sustainability (Aalto & Baskett  
64 2013; Komoroske & Lewison 2015; Scales *et al.* 2018; Welch *et al.* 2018). Therefore,  
65 exploring strategies to improve the harvested yields of the target species but keeping

66 the persistence of the bycatch species have great meanings in the practical  
67 applications. To date, protecting the bycatch species and simultaneously optimizing  
68 the target fisheries yields are still a challenge due to different sustainable catch rates  
69 among species (Hastings *et al.* 2017). Nevertheless, an extended two-species model  
70 predicts that establishing marine reserve can achieve conservation and fisheries  
71 benefits simultaneously, especially when the bycatch species are long-lived with low  
72 fecundity (Hastings *et al.* 2017). Although existing multispecies with mixed life  
73 histories demonstrates the important role that marine reserve played in  
74 ecosystem-based fisheries management, more specific information about how life  
75 histories affect the relative advantages between different fisheries management  
76 methods (e.g. traditional fishing effort control vs. establishing marine reserves) still  
77 needs further answers. Besides, previous researches suggest that a model with age  
78 structure plays an important and non-negligible role in deciding which fisheries  
79 management method is better (Hilborn 2017). Moreover, the limitations of implicit  
80 equilibrium conditions prevent barriers to investigate how the advantages of marine  
81 reserves in improving fisheries yields and maintaining bycatch persistence vary in  
82 relatively short time scales before the ecosystem achieves stable equilibrium states;  
83 that is the insight into the ecosystem with transient dynamics (Hopf *et al.* 2016;  
84 Hastings *et al.* 2018; Morozov *et al.* 2019).

85

86 Understanding how transient dynamics of fisheries yields response to different  
87 management strategies is essential for monitoring fisheries and making the right

88 decisions in adaptive management. Adaptive management is a widely accepted  
89 iterative approach to frequently regulate fisheries policy implementation based on the  
90 difference between empirical monitoring data and theoretical expectations (Kaplan *et*  
91 *al.* 2019; Nickols *et al.* 2019). It has been suggested that setting an expected timeline  
92 is necessary for adaptive management during the recovery of harvested populations  
93 (Kaplan *et al.* 2019). This derives from the fact that, once marine reserves are  
94 established, the abundance of fish populations may vary greatly and lead to  
95 undetectability in fisheries caused by a variety of factors including life histories  
96 (White *et al.* 2013; Kaplan *et al.* 2019; Nickols *et al.* 2019). These findings provide  
97 important inspirations to compare the relative yields advantages between fisheries  
98 management strategies of traditional effort control and the implementation of marine  
99 reserves. If the transient oscillations are too strong and the amplitude is big enough,  
100 fisheries yields under reserve implementation policy can probably be higher at one  
101 moment but lower at the other moment relative to the yields using nonspatial  
102 approaches, which increases the difficulty to decide between different fisheries  
103 management strategies. It has been demonstrated that life histories can greatly  
104 regulate transients in population abundance, and fish individuals with old ages at  
105 maturity and low natural mortality rates will increase transient dynamics (White *et al.*  
106 2013).

107

108 To explore the transient phenomena in fisheries management as well as the intrinsic  
109 mechanism, we develop theoretical frameworks consist of reserve-only and

110 no-reserve models which are derived from the two extreme cases in previous models  
111 (Hastings *et al.* 2017). We further extend the models to high dimensions by adding  
112 age structure to investigate the transient behavior of the target fish species (who are  
113 easily persistent even under the stress of fishing) under the persistence of the bycatch  
114 species (who have a high risk of going extinct) based on several assumptions. First,  
115 we assume that the transient dynamics of the target fish species are independent of the  
116 dynamics of the bycatch species (i.e. no ecological connections between two species)  
117 (Chen 2020). Second, we assume that the movement abilities are different between  
118 fish adults and larvae. Adults tend to be sedentary while larvae can disperse  
119 everywhere. Third, we assume that the proportions of fish individuals that are subject  
120 to reserve protection (i.e. marine reserve size) in the reserve-only model are the same  
121 for both target and bycatch species, and the fractions of fish stocks that left  
122 unharvested (i.e. escapement rate) in the no-reserve model are the same for two  
123 species. This assumption is possible in the real world when the costs of making  
124 fishing gear selective are relatively high. With these assumptions, we compare the  
125 fisheries yields measured by both number and weight under two different fisheries  
126 management strategies and explore the mechanism that causes the variations of the  
127 relative fisheries yields advantages. We investigate the effect of life histories on  
128 transient metrics through sensitive analysis, and wavelet analysis (which is an  
129 accepted method in transient analyses in ecology; see (Torrence & Compo 1998;  
130 Cazelles *et al.* 2008; Cazelles *et al.* 2014)) is used to observe the periodicity of the  
131 transient dynamics of the target fished species. With these analyses, we aim to answer

132 three questions: i) In transient time scales, whether and when the reserve-only policy  
133 can achieve advantages of fisheries yields under bycatch species persistence relative  
134 to no-reserve policy in fisheries management? ii) Whether transient fisheries  
135 management strategies depend on different fisheries yields measurements (i.e. number  
136 vs. weight)? iii) How life histories of both target fish species and bycatch species  
137 regulate the relative fisheries yields advantages between two fisheries management  
138 strategies during transient dynamics?

## 139 **Model**

### 140 **Model overview**

141 We study two-species systems with both the reserve-only model and the no-reserve  
142 model, which can achieve equivalent fisheries yields based on previous conclusions  
143 (Hastings & Botsford 1999; Hastings *et al.* 2017). The two species are the target  
144 species with strong stock in fisheries whose life histories such as high fecundity, early  
145 maturity make it easy to persist and the bycatch weak stock species which has reverse  
146 life histories and easier to reach an unacceptably low level. We consider the age  
147 structure (results without age structure are shown in Fig. S1) of the target species  
148 while ignoring the age structure of the weak stock species so that to simplify and  
149 focus on the central issue in this study. In addition to increasing age for all adults each  
150 year, the age structure of the target species is featured with two points: i) all the  
151 youngest adults come from the larvae recruitment in one year; ii) all the oldest adults  
152 (i.e. reach the maximum age) will die next year. Among different age classes, we  
153 assume that older mature individuals have higher fecundity. See schematic in Fig. 1.

154 The per-capita fecundity in each age class is expressed as  $\mathbf{m} = (m_1, m_2, \dots, m_n)^T$ ,  
155 and the corresponding weight per individual is  $\mathbf{B} = (B_1, B_2, \dots, B_n)^T$ . We denote  $a_M$   
156 as the age at maturity, then fecundity is zero when fish individual age is smaller than  
157 the threshold  $a_M$  and the fecundity (expressed as a function of length) is  $m_a =$   
158  $q[L_M(1 - e^{-k(a-a_0)})]^d$  when fish individual age surpasses the threshold of maturity  
159 (White *et al.* 2013; Kaplan *et al.* 2019), where  $a$  is fish individual age,  $L_M$  is the  
160 fish individual asymptotic maximum length,  $k$  is the growth rate,  $q$  and  $d$  are  
161 constants, and  $a_0$  is the age at length zero. Similarly, fish individual weight at age  $a$   
162 is expressed as  $B_a = p[L_M(1 - e^{-k(a-a_0)})]^w$ , where  $p$  and  $w$  are constants  
163 (Kaplan *et al.* 2019).

#### 164 **Part 1 reserve-only model**

165 When only using marine reserves rather than fixed harvesting rates as fisheries  
166 management methods, an implicit assumption is that all adult fish are harvested  
167 outside marine reserves. To maintain the persistence of weak stock species (i.e.  
168 non-target fish species), the reserve size  $c$  should be no smaller than a critical value.  
169 According to previous research (Hastings *et al.* 2017), the critical value is

$$170 \quad c^* = (1-s_w)/(\alpha_w m_w), \quad (1)$$

171 where  $s_w$ ,  $\alpha_w$ , and  $m_w$  are survival rate, proliferation rate per generation, and  
172 per-capita fecundity for the weak stock species, respectively.

173

174 The adult density with age structure at time  $t$  inside the marine reserve is defined as

175  $\mathbf{N}_t^R = (N_{1,t}^R, N_{2,t}^R, \dots, N_{n,t}^R)^T$ . Thus, the total number of larvae produced inside the



176 marine reserve is the dot product of adult density and fecundity multiplied by the  
177 reserve size. Based on the “well-mixed” assumption as suggested in previous research  
178 (Hastings & Botsford 1999; Hart 2006; Hopf *et al.* 2019), the larvae density both  
179 inside and outside the marine reserve is  $c\mathbf{m}^T \cdot \mathbf{N}_t^R$  which equals the total number  
180 because the total marine system size is scaled as 1. Therefore, the density of larvae  
181 that survive to adults will be

$$182 \quad A_{t+1} = f(c\mathbf{m}^T \cdot \mathbf{N}_t^R), \quad (2)$$

183 where  $f(\cdot)$  is the Beverton–Holt growth function. We further define the adult natural  
184 survival rate each year as a fixed value  $s$ ; note that all fish individuals will die next  
185 year once they achieve the maximum age (See Fig. 1a). According to simple  
186 derivations (see Section one in appendix), the age-structured adult density inside  
187 reserve at time  $t$  is

$$188 \quad \mathbf{N}_t^R = (A_t, sA_{t-1}, s^2A_{t-2}, \dots, s^{n-1}A_{t-n+1})^T. \quad (3)$$

189 The fisheries yields measured by number can be expressed as

$$190 \quad Y_t^{nR} = A_t(1 - c), \quad (4)$$

191 and the fisheries yields measured by weight can be expressed as

$$192 \quad Y_t^{wR} = B_1A_t(1 - c). \quad (5)$$

## 193 **Part 2 no-reserve model**

194 When using traditional ways of fixed harvesting rate without marine reserves (See Fig.  
195 1b), the escapement rate  $E$  should be no smaller than the critical value  $E^*$  to maintain  
196 the persistence of the weak stock species. Based on previous research (Hastings *et al.*  
197 2017), we have

198 
$$E^* = \frac{1}{s_w + \alpha_w \cdot m_w}. \quad (6)$$

199 Defining  $a_E$  as the critical age that fish individuals are harvested, the escapement  
 200 rate is 1 when fish individual age is smaller than  $a_E$ , and the escapement rate is  $E^*$   
 201 when fish individual age is larger than  $a_E$ . With a general form, we denote the  
 202 escapement rate for the age-structured strong stock species as  $\mathbf{E} = (E_1, E_2, \dots, E_n)^T$ ,  
 203 and the population density at time  $t$  is  $\mathbf{N}_t^O = (N_1, {}_tO, N_{2,t}^O, \dots, {}_o_{Nn,t})^T$ . Similar to the  
 204 reserve-only model, the total larvae produced by all the adults are the dot product of  
 205 adult density and fecundity. Thus, the density of larvae that survive to adults will be

206 
$$A'_{t+1} = f(\mathbf{m}^T \cdot \mathbf{N}_t^O). \quad (7)$$

207 The age-structured adult density at time  $t$  is

208 
$$\mathbf{N}_t^O = (A'_t E_1, s E_2 A'_{t-1} E_1, \dots, s^{n-1} \prod_{j=1}^n E_j A'_{t-n+1})^T, \quad (8)$$

209 and the specific derivation can be seen in Section one in the appendix. To exhibit  
 210 fisheries yields with concise form in the next step, we show the density at time  $t$   
 211 before harvesting as

212 
$$\mathbf{N}_t^{OT} = (A'_t, s E_1 A'_{t-1}, \dots, s^{n-1} A'_{t-n+1} \prod_{j=1}^{n-1} E_j)^T, \quad (9)$$

213 and thus, the fisheries yields in number can be expressed as

214 
$$Y_t^{nO} = (\mathbf{N}_t^{OT})^T \cdot (1 - \mathbf{E}), \quad (10)$$

215 and the fisheries yields in weight can be expressed as

216 
$$Y_t^{wO} = \text{sum}[\mathbf{B} \circ \mathbf{N}_t^{OT} \circ (1 - \mathbf{E})]. \quad (11)$$

217 **Results**

218 Our results have shown the transient oscillations can occur for the dynamics of  
 219 population densities (Fig. 2a<sub>1</sub>-a<sub>7</sub>), fisheries yields measured by number (Fig. 2b<sub>1</sub>-b<sub>7</sub>)

220 and fisheries yields measured by weight (Fig. 2c<sub>1-c7</sub>), and the periodicity is exhibited  
221 with wavelet analyses (Fig. 3). Moreover, regardless of the measurement methods (i.e.  
222 measured by weight or measured by number), the fisheries yields produced by the  
223 reserve-only model can always be higher (red) or lower (yellow) than the yields  
224 produced by the no-reserve model with appropriate hypothetical parameter settings  
225 during the whole transient period (Fig. 2b<sub>1</sub>; Fig. 2c<sub>1</sub>). In other cases, it would be  
226 difficult to judge which model can achieve higher fisheries yields as the transient  
227 oscillations lead to higher fisheries yields with the reserve-only model at one moment  
228 while lower ones at another moment and this is true for both kinds of yields measured  
229 by weight and by number (blue lines in Fig. 2b<sub>1</sub> and Fig. 2c<sub>1</sub>). The parameter values  
230 are arbitrary. However, the yield comparison conclusion that three situations (i.e.  
231 fisheries yields with the reserve-only model is higher, lower, or difficult to judge  
232 relative to yields with no-reserve model) can happen is robust with other parameters  
233 values and with different bycatch species for all the hypothetical cases (Fig. 2b<sub>1-b3</sub>;  
234 Fig. 2c<sub>1-c3</sub>). For the empirical cases, the results about the relative advantages of  
235 fisheries yields between two fisheries management methods (i.e. methods with  
236 reserve-only model vs. no-reserve model) are consistent with that for the hypothetical  
237 cases (i.e. all three situations can occur) if fisheries yields are measured by weight  
238 (Fig. 2c<sub>4-c7</sub>). However, if fisheries yields are measured by the number, fisheries  
239 yields with the reserve-only model are always higher relative to that with the  
240 no-reserve model (Fig. 2b<sub>4-b7</sub>).

241 The effect of life histories for target species on fisheries yields shows that, with

242 empirical parameter settings, fisheries management methods with the reserve-only  
243 model can always lead to higher fisheries yields relative to the no-reserve model no  
244 matter how influencing factors (age at maturity, age at fishing and adult survivorship  
245 for the target species) varies among the suitable parameter value ranges (Fig. 4a-c).  
246 However, the relative advantages in fisheries yields change with influencing factors if  
247 fisheries yields are measured by weight (Fig. 4e-g). Specifically, the target species  
248 with life histories of younger age at maturity, younger age at fishing, and higher adult  
249 survivorship can achieve higher fisheries yields with no-reserve fisheries management  
250 method relative to the reserve-only method. On the contrary, the target species with  
251 reversed life histories can lead to higher fisheries yields with the reserve-only method  
252 relative to the no-reserve method. The robust results still hold among different weak  
253 species (shown in different colors in Fig. 4) and among different time steps (Fig. S2,  
254 S3). For the hypothetical cases, the effects of adult survivorship on fisheries yields  
255 measured by weight (i.e. higher adult survivorship benefits for methods with  
256 no-reserve model) are similar to the results for the empirical cases (Fig. 4g; Fig. S4g,  
257 S5g, S6g), while the effects of other factors (age at maturity and age at fishing) on  
258 both kinds of fisheries yields as well as the effects of adult survivorship on fisheries  
259 yields measured by number are different from that for the empirical cases (Fig. 4; Fig.  
260 S4, S5, S6).

261

262 For the empirical cases, fisheries yields measured by both number and weight are  
263 always higher with the no-reserve fisheries management method than that with the

264 reserve-only method if the critical values of reserve size for the weak species  
265 persistence in the reserve-only model are identical to the critical values of escapement  
266 rate in the no-reserve model (Fig. 4d, h). However, fisheries management with the  
267 reserve-only method can achieve higher fisheries yields relative to the no-reserve  
268 method if the critical reserve size is small while the critical escapement rate is very  
269 large. On the contrary, for the hypothetical cases, fisheries yields with the no-reserve  
270 method are always lower than that with the reserve-only method when the critical  
271 reserve size and escapement rate are equal, and could be higher when the critical  
272 escapement rate is mediate and the critical reserve size is too big or too small (Fig.  
273 S4d, h; Fig. S5d, h; Fig. S6d, h). This suggests that the critical reserve size in the  
274 reserve-only model and the critical escapement rate in the no-reserve model can  
275 greatly regulate the relative yield advantages between two fisheries management  
276 methods (i.e. which method can achieve higher fisheries yields), which is important as  
277 the critical values of both reserve size and escapement rate are linked to the life  
278 histories of the bycatch weak stock species to meet the persistence condition.

279

280 Sensitive analyses show that the transient metric  $\theta$  oscillates and has strong  
281 periodicity with the variations of influencing factors (i.e. age at maturity, age at  
282 fishing, and adult survivorship) (Fig. 5, Fig. S7, Fig. S8). It suggests that the initial  
283 trajectories of the system periodically close to or leave the stable level, and thus the  
284 amplitude of the oscillations of the population dynamics decrease or increase  
285 periodically by regulating the life histories of the target species such as age at maturity,

286 age at fishing as well as adult survivorship.

## 287 **Discussion**

288 Marine reserves are important in fisheries management (Mangel 2000; Edgar *et al.*  
289 2014; Herrera *et al.* 2016). Our results have shown that fisheries management  
290 strategies by only establishing marine reserves without fishing effort control cannot  
291 always be the optimal method to improve the fisheries yields as well as maintain  
292 species persistence if the dynamics of the two-species system is investigated from the  
293 transient short time scale rather than the asymptotic equilibrium state. When fisheries  
294 management with marine reserves can achieve higher fisheries yields relative to  
295 traditional management with fishing effort control depends on the measurement  
296 methods of fisheries yields and the life histories of both the target species and the  
297 bycatch species. If fisheries yields are measured by fish individual numbers,  
298 establishing a marine reserve could be the primary fisheries management strategies,  
299 especially for the US West Coast groundfish fishery (Hastings *et al.* 2017; Nickols *et*  
300 *al.* 2019; Chen 2020). If fisheries yields are measured by weight which can make the  
301 theoretical frameworks include the difference of both fecundity and biomass for fish  
302 individuals of different ages (Kaplan *et al.* 2019), traditional fishing effort control will  
303 not be the obvious disadvantage strategies in both improving fisheries yields and  
304 maintaining species persistence. The effect of fisheries yields measurement on  
305 fisheries management strategies derives from the fact that fisheries management by  
306 establishing marine reserves only harvest relatively young adults each year because  
307 all the adult fish individuals in the harvested area come from the larvae dispersal from

308 the marine reserves, while fisheries management by fishing effort control can harvest  
309 relatively old adult which have relatively large biomass (or weight). Thus, the  
310 measurement with weight benefits for the traditional fisheries management in  
311 evaluating its advantage of improving fisheries yields.

312

313 Further mechanisms show that whether the fisheries management strategies of  
314 no-reserve can improve fisheries yields under bycatch persistence depends on the life  
315 histories of both target and bycatch species. If the target species are younger at  
316 maturity or have higher adult survivorship, strategies with no-reserve can achieve  
317 higher fisheries yields relative to the target species with older age at maturity or with  
318 lower adult survivorship (Fig. 4). Nevertheless, for the hypothetical cases, the effect  
319 of age at maturity and age at fishing on both kinds of fisheries yields are complex  
320 among different weak species relative to empirical cases; that is fisheries yields with  
321 the reserve-only model are higher relative to yields with the no-reserve model for one  
322 weak species while it is lower for another weak species (Fig. 4; Fig. S4, S5, S6). The  
323 differences between the hypothetical and the empirical cases derive from the fact that  
324 adult survivorship in the hypothetical cases is very low while it is very high in the  
325 empirical cases (Hastings *et al.* 2017; Chen 2020). Thus, both the age at maturity and  
326 at fishing cannot be too old in hypothetical cases. Otherwise, the target strong stock  
327 species cannot persist.

328

329 The life histories of the bycatch species can regulate the relative yield advantages

330 between two fisheries management strategies through deciding the critical reserve size  
331 and escapement rate to maintain persistence according to the weak stock persistence  
332 conditions shown in Eq. 1 and Eq. 6. For example, if the critical reserve size is 0.1  
333 and the critical escapement rate is 0.95 so that fisheries management with  
334 reserve-only strategies can achieve higher fisheries yields relative to no-reserve  
335 strategies (Fig. 4), the corresponding life histories of the bycatch species can be  
336 predicted by the combination of Eq. 1 and Eq. 6 through controlling one life-history  
337 parameter (e.g. achieve adult survivorship and fecundity by controlling proliferation  
338 rate per generation). On the contrary, solving equations 1 and 6 with the assumption  
339 that the critical reserve size equals the critical escapement rate can achieve life  
340 histories of bycatch under which strategies with no-reserve produce higher fisheries  
341 yields relative to strategies with only reserves. In such a case, even if the bycatch  
342 species are long-lived with low fecundity which is important based on the previous  
343 model (Hastings *et al.* 2017), reserves cannot make sure benefits simultaneously in  
344 fisheries and conservation.

345

346 The life histories can regulate the relative fisheries yields advantages between two  
347 fisheries management strategies through the other perspective by regulating the  
348 amplitude of the transient oscillations. To make the relative yield advantages  
349 predictable, the amplitude of the transient oscillations of the system should not be too  
350 big. Otherwise, the “up and down” of the fisheries yields with time will make it  
351 complex to predict which fisheries management strategy (no-reserve vs. reserve-only)



352 is more suitable for both conservation and fisheries goals. To achieve small amplitude  
353 of the transient oscillations, the life histories of both the target and bycatch species  
354 can be regulated because of the periodical relationships between the transient metric  
355  $\theta$  (which decides the amplitude of transient oscillations (White *et al.* 2013; Kaplan *et*  
356 *al.* 2019; Chen 2020)) and life history parameters of both the target and bycatch  
357 species (Fig.5).

358

359 We consider the effect of age structure in the main research. If there is no age  
360 structure as shown in Hastings *et al.* (2017) (fisheries yields measured by weight are  
361 identical to that measured by number), the transient analysis suggests that traditional  
362 fisheries management methods can achieve higher fisheries yields relative to  
363 strategies with marine reserves, but it cannot maintain the persistence of the bycatch  
364 species (yellow color in Fig. S1). When bycatch species is persistent, strategies with  
365 marine reserves can achieve higher fisheries yields (Fig. S1), which is consistent with  
366 previous equilibrium research that strategies with marine reserves can perform an  
367 important role in fisheries management by solving bycatch problems (Hastings *et al.*  
368 2017). However, when the adult survivorship is very high as shown in the empirical  
369 cases, traditional strategies without reserves can achieve higher fisheries yields  
370 relative to strategies with marine reserves and maintain bycatch species persistence at  
371 the beginning of the transient time scales, which is consistent with our results with  
372 age structure regardless of the results without age structure at the equilibrium state  
373 still show the advantage of strategies with marine reserves (Fig. 2; Fig. S1h, j, l, n).

374 Besides, relative to our theoretical frameworks, models developed by Hastings et al.  
375 (2017) do not show obvious transient phenomena (Fig. S1), which are consistent with  
376 previous conclusions that transients are difficult to observe in models without age  
377 structure (White *et al.* 2013; Chen 2020). This derives from the fact that age structure  
378 often leads to high dimensions which have been suggested to be the main mechanism  
379 to cause transients (Hastings *et al.* 2018; Morozov *et al.* 2019).

380

381 Previous investigations in the transient dynamics of fish abundance after establishing  
382 marine reserves indicate that the transient metric  $\theta$  (which determines the amplitude  
383 of the transient oscillations) becomes, in general, large with the increasing of age at  
384 maturity and small with the increasing of natural mortality (White *et al.* 2013).  
385 However, our sensitivity analyses indicate that the transient metric  $\theta$  increases and  
386 decreases periodically with the variation of both ages at maturity and adult  
387 survivorship (Fig. 5). The difference between our research and previous ones (White  
388 *et al.* 2013) derives from the fact that previous research considers the transient  
389 response of linear models with Leslie matrices while we consider the non-linear ones  
390 and thus the eigenvalues of matrix  $A$  and  $A'$  vary with population density (Section  
391 two in appendix). These results suggest that considering the non-linear effect of larval  
392 survival to adult will increase the difficulty of investigating the transient dynamics as  
393 the predictability periodically varies with life histories, and thus increase the difficulty  
394 to judge which fisheries management strategies (reserve-only vs. no-reserve) perform  
395 better. Further insight into the periodicity of the transient dynamics of the system with

396 time is helpful for predictability, and our wavelet analyses provide answers for this  
397 (Fig. 3; Fig. S9-S14).

398

399 Our researches are based on the “scorched earth” assumption (Malvadkar & Hastings  
400 2008; Edwards *et al.* 2010) for the fisheries management with reserve-only strategies,  
401 which does not consider the effect of economic costs in fisheries(Sanchirico *et al.*  
402 2006; White *et al.* 2008). If the effect of economic costs is considered, harvesting all  
403 adults in the harvested area (i.e. the scorched earth assumption) can lead to high  
404 harvesting costs in fisheries as the catchability decreases with the decreasing of  
405 population density in the natural system. In that case, costs with reserve-only  
406 strategies are higher and may not be a better choice for fisheries management relative  
407 to traditional methods without reserves.

408

409 We ignore the age structure of the bycatch species so that the persistence conditions  
410 are easy to achieve although the conditions are necessary but not sufficient (Chen  
411 2020). By considering the age structure of the bycatch species, high dimensions lead  
412 to much complex persistence conditions, which deserves developing new analytical  
413 and simulation approaches. However, similar conclusions may be achieved even if we  
414 consider the effect of the age structure of the bycatch species if new theoretical  
415 frameworks are still based on the assumption that there are no ecological connections  
416 between the target and the bycatch species. Future works can explore the  
417 predator-prey or competition connections between the target and the bycatch species,

418 which can greatly regulate the population density of both species (Frid & Marliave  
419 2010; Aalto & Baskett 2013) and thus further play a role in predicting relatively  
420 higher fisheries yields between different fisheries management strategies under  
421 bycatch persistence in transient time scales (specific information is shown in another  
422 manuscript).

423

#### 424 **Materials and methods**

425 With both reserve-only and no-reserve models, we first simulate the transient  
426 dynamics of the population density and fisheries yields of the target species. The  
427 system starts with the initial condition at a stable age distribution. To make a  
428 comparison, the initial conditions are the same for both reserve-only and no-reserve  
429 models. The parameter values for simulations come from previous researches  
430 (Hagerman 1952; Hunter *et al.* 1990; White *et al.* 2013; Hastings *et al.* 2017; Kaplan  
431 *et al.* 2019; Chen 2020) and can be seen in Table S1. We use the average values if  
432 these parameters are different between male and female individuals. Specifically,  
433  $\alpha_0 = -5.10$ ,  $d = 2.96$ ,  $p = 2.41 \times 10^{-4}$ ,  $w = 2.96$ ,  $k = 0.087$ ,  $L_M = 45.55$ , and  
434 the maximum age is 50. Coefficient  $q$  is regulated to maintain a positive growth rate.  
435 The Beverton–Holt functional form is  $f(n) = \frac{\alpha\beta n}{\beta+n}$  (Chen 2020), where  $\alpha$  and  $\beta$   
436 denote the proliferation rate per generation and carrying capacity, respectively. We  
437 explore the effect of life histories on transient metric  $\theta$  which determines the  
438 amplitude of transient oscillations and measures how close the initial system state is  
439 to the final equilibrium state (White *et al.* 2013; Kaplan *et al.* 2019). To calculate

440 transient metric  $\theta$ , we transform both reserve-only and no-reserve models into  
441 identical cases (see details in Section two in appendix).

442

443 **Ethics.** This article has no ethical problems.

444 **Data accessibility.** This article has no additional data and there is no need to deposit  
445 data to a public repository.

446 **Author contributions.** Renfei Chen designed research, performed research, and  
447 wrote the paper; Chengyi Tu performed the wavelet analyses; Quan-Xing Liu edited  
448 and wrote the paper.

449 **Competing interests.** There are no competing interests.

450 **Funding.** This research is supported by a foundation from Shanxi Normal University  
451 (0505/02070499), funding from Shanxi Province (0110/02010002), and Microsoft AI  
452 for Earth and Yunnan University project C176210103.

453

## 454 **References**

455 1.

456 Aalto, E.A. & Baskett, M.L. (2013). Quantifying the balance between bycatch and predator or  
457 competitor release for nontarget species. *Ecol. Appl.*, 23.

458 2.

459 Cazelles, B., Cazelles, K. & Chavez, M. (2014). Wavelet analysis in ecology and epidemiology:  
460 impact of statistical tests. *Journal of The Royal Society Interface*.

461 3.

462 Cazelles, B., Chavez, M., Berteaux, D., Ménard, F., Vik, J.O., Jenouvrier, S. *et al.* (2008).

463 Wavelet analysis of ecological time series. *Oecologia*, 156, 287-304.

464 4.

465 Chen, R. (2020). Transient inconsistency between population density and fisheries yields

466 without bycatch species extinction. *Ecology and Evolution*, 0, 1-13.

467 5.

468 Chen, R., Baskett, M.L. & Hastings, A. (2020). Fishing the line depends on reserve benefits,

469 individual losing at boundary and movement preference. *bioRxiv*.

470 6.

471 Cohen, P.J. & Foale, S.J. (2013). Sustaining small-scale fisheries with periodically harvested

472 marine reserves. *Mar. Policy*, 37, 278-287.

473 7.

474 Edgar, G.J., Stuart-Smith, R.D., Willis, T.J., Kininmonth, S., Baker, S.C., Banks, S. *et al.*

475 (2014). Global conservation outcomes depend on marine protected areas with five key

476 features. *Nature*, 506, 216-220.

477 8.

478 Edwards, H.J., Elliott, I.A., Pressey, R.L. & Mumby, P.J. (2010). Incorporating ontogenetic

479 dispersal, ecological processes and conservation zoning into reserve design. *Biol.*

480 *Conserv.*, 143, 457-470.

481 9.

482 Frid, A. & Marliave, J. (2010). Predatory fishes affect trophic cascades and apparent

483 competition in temperate reefs. *Biol. Lett.*, 6, 533-536.

484 10.

485 Gaines, S.D., White, C., Carr, M.H. & Palumbi, S.R. (2010). Designing marine reserve  
486 networks for both conservation and fisheries management. *Proc Natl Acad Sci U S A*,  
487 107, 18286-18293.

488 11.

489 Game, E.T., Bode, M., McDonald-Madden, E., Grantham, H.S. & Possingham, H.P. (2009).  
490 Dynamic marine protected areas can improve the resilience of coral reef systems.  
491 *Ecol. Lett.*, 12, 1336-1346.

492 12.

493 Hagerman, F.B. (1952). The biology of the Dover sole, *Microstomus pacificus* (Lockington).  
494 *STATE OF CALIFORNIA DEPARTMENT OF FISH AND GAME BUREAU OF*  
495 *MARINE FISHERIES; FISH BULLETIN No. 85*

496 13.

497 Hart, D.R. (2006). When do marine reserves increase fishery yield? *Canadian Journal of*  
498 *Fisheries & Aquatic Sciences*, 63, 1445-1449.

499 14.

500 Hastings, A., Abbott, K.C., Cuddington, K., Francis, T., Gellner, G., Lai, Y.-C. *et al.* (2018).  
501 Transient phenomena in ecology. *Science*, 361, eaat6412.

502 15.

503 Hastings, A. & Botsford, L.W. (1999). Equivalence in Yield from Marine Reserves and  
504 Traditional Fisheries Management. *Science*, 284, 1537-1538.

505 16.

- 506 Hastings, A., Gaines, S.D. & Costello, C. (2017). Marine reserves solve an important bycatch  
507 problem in fisheries. *Proc. Natl. Acad. Sci. USA*, 114, 8927-8934.
- 508 17.
- 509 Herrera, G.E., Moeller, H.V. & Neubert, M.G. (2016). High-seas fish wars generate marine  
510 reserves. *Proc. Natl. Acad. Sci. USA*, 113, 3767-3772.
- 511 18.
- 512 Hilborn, R. (2017). Traditional fisheries management is the best way to manage weak stocks.  
513 *Proc. Natl. Acad. Sci. USA*, 114, E10610-E10610.
- 514 19.
- 515 Hopf, J.K., Jones, G.P., Williamson, D.H. & Connolly, S.R. (2016). Fishery consequences of  
516 marine reserves: short-term pain for longer-term gain. *Ecol. Appl.*
- 517 20.
- 518 Hopf, J.K., Jones, G.P., Williamson, D.H. & Connolly, S.R. (2019). Marine reserves stabilize  
519 fish populations and fisheries yields in disturbed coral reef systems. *Ecol. Appl.*, 29.
- 520 21.
- 521 Hunter, J.R., Butler, J.L., Kimbrell, C. & Lynn, E.A. (1990). Bathymetric patterns in size, age,  
522 sexual maturity, water content, and caloric density of Dover sole, *Microstomus*  
523 *pacificus*. *CalCOFI Invest. Rep*, 31, 132-144.
- 524 22.
- 525 Kaplan, K.A., Yamane, L., Botsford, L.W., Baskett, M.L., Hastings, A., Worden, S. *et al.* (2019).  
526 Setting expected timelines of fished population recovery for the adaptive management  
527 of a marine protected area network. *Ecol. Appl.*, 29, e01949.



- 528 23.
- 529 Komoroske, L.M. & Lewison, R.L. (2015). Addressing fisheries bycatch in a changing world.
- 530 *Frontiers in Marine Science*, 2, 1-11.
- 531 24.
- 532 Malvadkar, U. & Hastings, A. (2008). Persistence of mobile species in marine protected areas.
- 533 *Fisheries Research*, 91, 69-78.
- 534 25.
- 535 Mangel, M. (2000). On the fraction of habitat allocated to marine reserves. *Ecol. Lett.*, 3,
- 536 15-22.
- 537 26.
- 538 Morozov, A., Abbott, K., Cuddington, K., Francis, T., Gellner, G., Hastings, A. *et al.* (2019).
- 539 Long transients in ecology: theory and applications. *Physics of Life Reviews*.
- 540 27.
- 541 Nickols, K.J., White, J.W., Malone, D., Carr, M.H., Starr, R.M., Baskett, M.L. *et al.* (2019).
- 542 Setting ecological expectations for adaptive management of marine protected areas. *J.*
- 543 *Appl. Ecol.*, 56, 2376-2385.
- 544 28.
- 545 Sanchirico, J.N., Malvadkar, U., Hastings, A. & Wilen, J.E. (2006). When are no-take zones an
- 546 economically optimal fishery management strategy? *Ecol. Appl.*, 16, 1643-1659.
- 547 29.
- 548 Scales, K.L., Hazen, E.L., Jacox, M.G., Castruccio, F., Maxwell, S.M., Lewison, R.L. *et al.*
- 549 (2018). Fisheries bycatch risk to marine megafauna is intensified in Lagrangian

- 550 coherent structures. *Proc. Natl. Acad. Sci. USA*, 115, 7362-7367.
- 551 30.
- 552 Torrence, C. & Compo, G.P. (1998). A Practical Guide to Wavelet Analysis. *Bulletin of the*
- 553 *American Meteorological Society*, 79.
- 554 31.
- 555 Welch, H., Pressey, R. & Reside, A. (2018). Using temporally explicit habitat suitability models
- 556 to assess threats to mobile species and evaluate the effectiveness of marine protected
- 557 areas. *J. Nat. Conserv.*, 41, 106-115.
- 558 32.
- 559 White, C., Kendall, B.E., Gaines, S., Siegel, D.A. & Costello, C. (2008). Marine reserve effects
- 560 on fishery profit. *Ecol. Lett.*, 11, 370-379.
- 561 33.
- 562 White, J.W., Botsford, L.W., Hastings, A., Baskett, M.L., Kaplan, D.M. & Barnett, L.A. (2013).
- 563 Transient responses of fished populations to marine reserve establishment. *Conservation*
- 564 *Letters*, 6, 180-191.

565 **Figure legend**

566 **Figure 1. Schematic of the theoretical frameworks.** (a) fisheries strategies by only  
567 using reserves. (b) traditional fisheries strategies by fishing effort control without  
568 reserves. The life histories of both target and bycatch species do not change between  
569 different fisheries strategies.

570 **Figure 2. Transient dynamics of population density and fisheries yields for target**  
571 **species under the persistence of different bycatch species.** Solid lines denote  
572 reserve-only strategies, and dashed lines denote no-reserve strategies. Different colors  
573 represent different parameter settings to perform sensitivity analyses. (a<sub>1</sub>-a<sub>7</sub>) Transient  
574 dynamics of population density. Note that population density with reserve-only  
575 strategies denotes density inside marine reserves. (b<sub>1</sub>-b<sub>7</sub>) transient dynamics of  
576 fisheries yields measured by number. (c<sub>1</sub>-c<sub>7</sub>) transient dynamics of fisheries yields  
577 measured by weight. a<sub>1</sub>-a<sub>7</sub>, b<sub>1</sub>-b<sub>7</sub>, and c<sub>1</sub>-c<sub>7</sub> correspond to situations 1-7, and specific  
578 definitions and differences among different situations can be seen in (Chen 2020).

579

580 **Figure 3. Wavelet analyses of the transient dynamics in an empirical case.**  
581 (Corresponding to the last line in figure 2, i.e. situation 7). It denotes the wavelet  
582 power spectrum of the raw series, and the power values increase from white (low  
583 values) to dark red (high values).

584

585 **Figure 4. Effects of life histories and harvesting management on fisheries yields**  
586 **with both reserve-only and no-reserve strategies for empirical cases (situations**

587 **4-7).** (a-c) Fisheries yields measured by number response to age at maturity, age at  
588 fishing, adult survivorship, respectively for target species. (d) Fisheries yields  
589 measured by number response to the critical reserve size and the critical escapement  
590 rate. (e-g) Fisheries yields measured by weight response to age at maturity, age at  
591 fishing, adult survivorship, respectively for target species. (h) Fisheries yields  
592 measured by weight response to the critical reserve size and the critical escapement  
593 rate. In a-c and e-g, solid lines denote reserve-only strategies, and dashed lines denote  
594 no-reserve strategies. Different colors represent different bycatch species. In d and h,  
595 yellow colors denote critical reserve size with reserve-only strategies, and red colors  
596 denote critical escapement rate with no-reserve strategies. All subplots denote the time  
597 step at 50. Parameter settings: (a, e)  $q = 50$ ,  $a_E = 0$ ; (b, f)  $q = 50$ ,  $a_M = 1$ ; (c, d, g, h)  $q$   
598  $= 50$ ,  $a_M = 1$ ,  $a_E = 0$ ; see Table S1 and Materials and methods for other parameters.

599

600 **Figure 5. Sensitive analyses of transient metric  $\theta$  in response to different**  
601 **parameters for empirical case (situation 7) with different fisheries management**  
602 **strategies.** (a) age at maturity, (b) age at fishing, (c) adult survivorship, (d) critical  
603 reserve size (yellow) and critical escapement rate (red). In a and c, yellow color  
604 denotes reserve-only strategies, and red colors denote no-reserve strategies. Parameter  
605 settings: (a)  $q = 50$ ,  $a_E = 0$ ; (b)  $q = 50$ ,  $a_M = 1$ ; (c, d)  $q = 50$ ,  $a_M = 1$ ,  $a_E = 0$ ; see Table  
606 S1 and Materials and methods for other parameters.

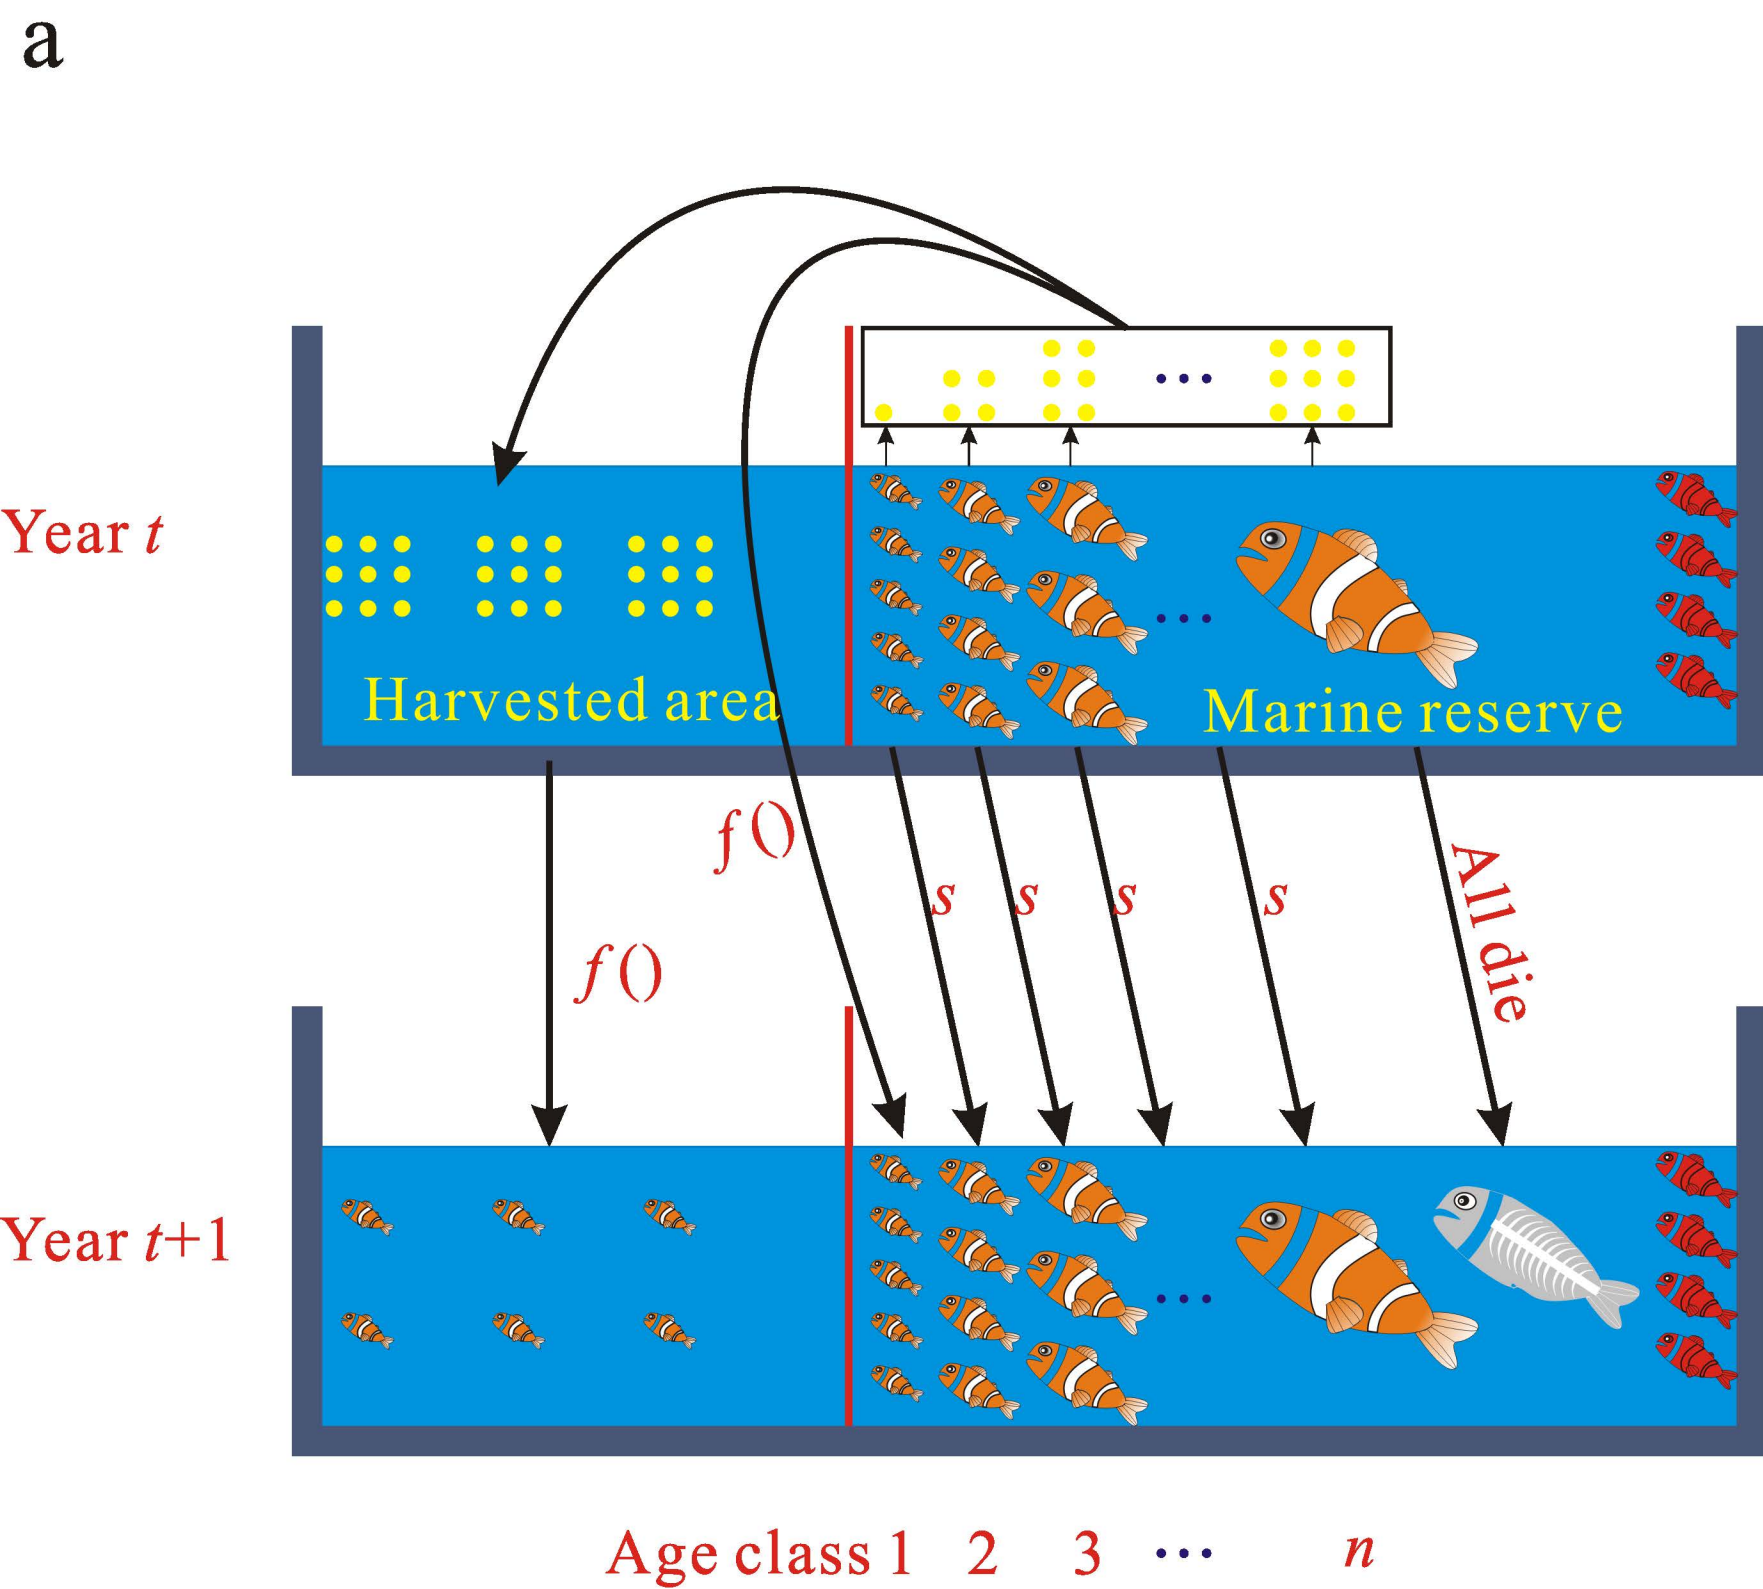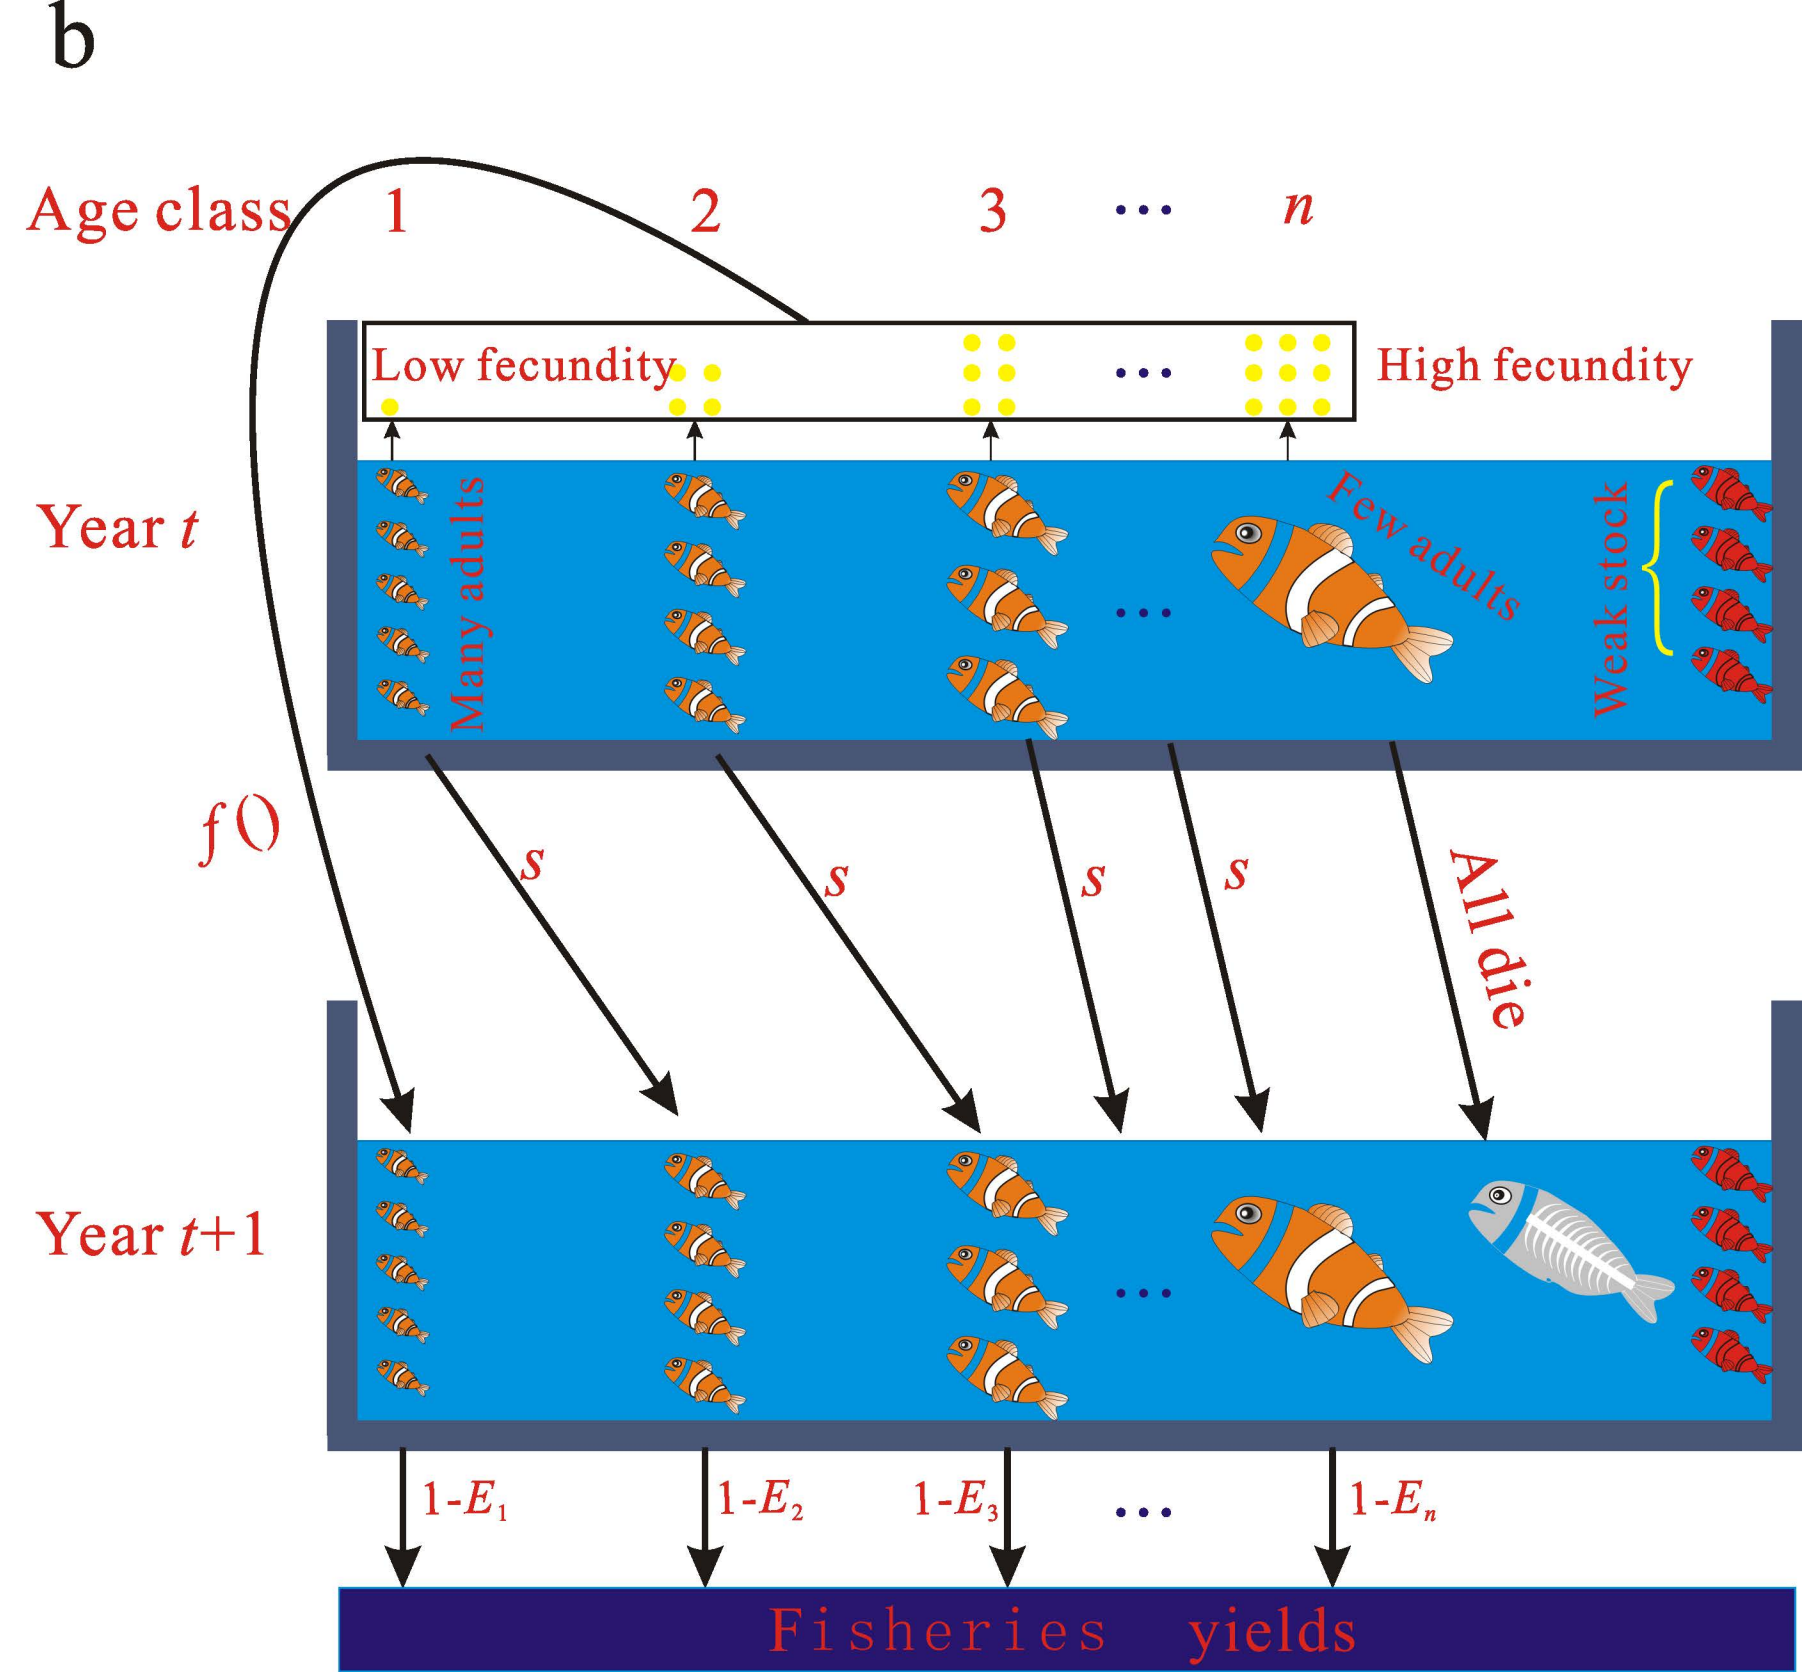

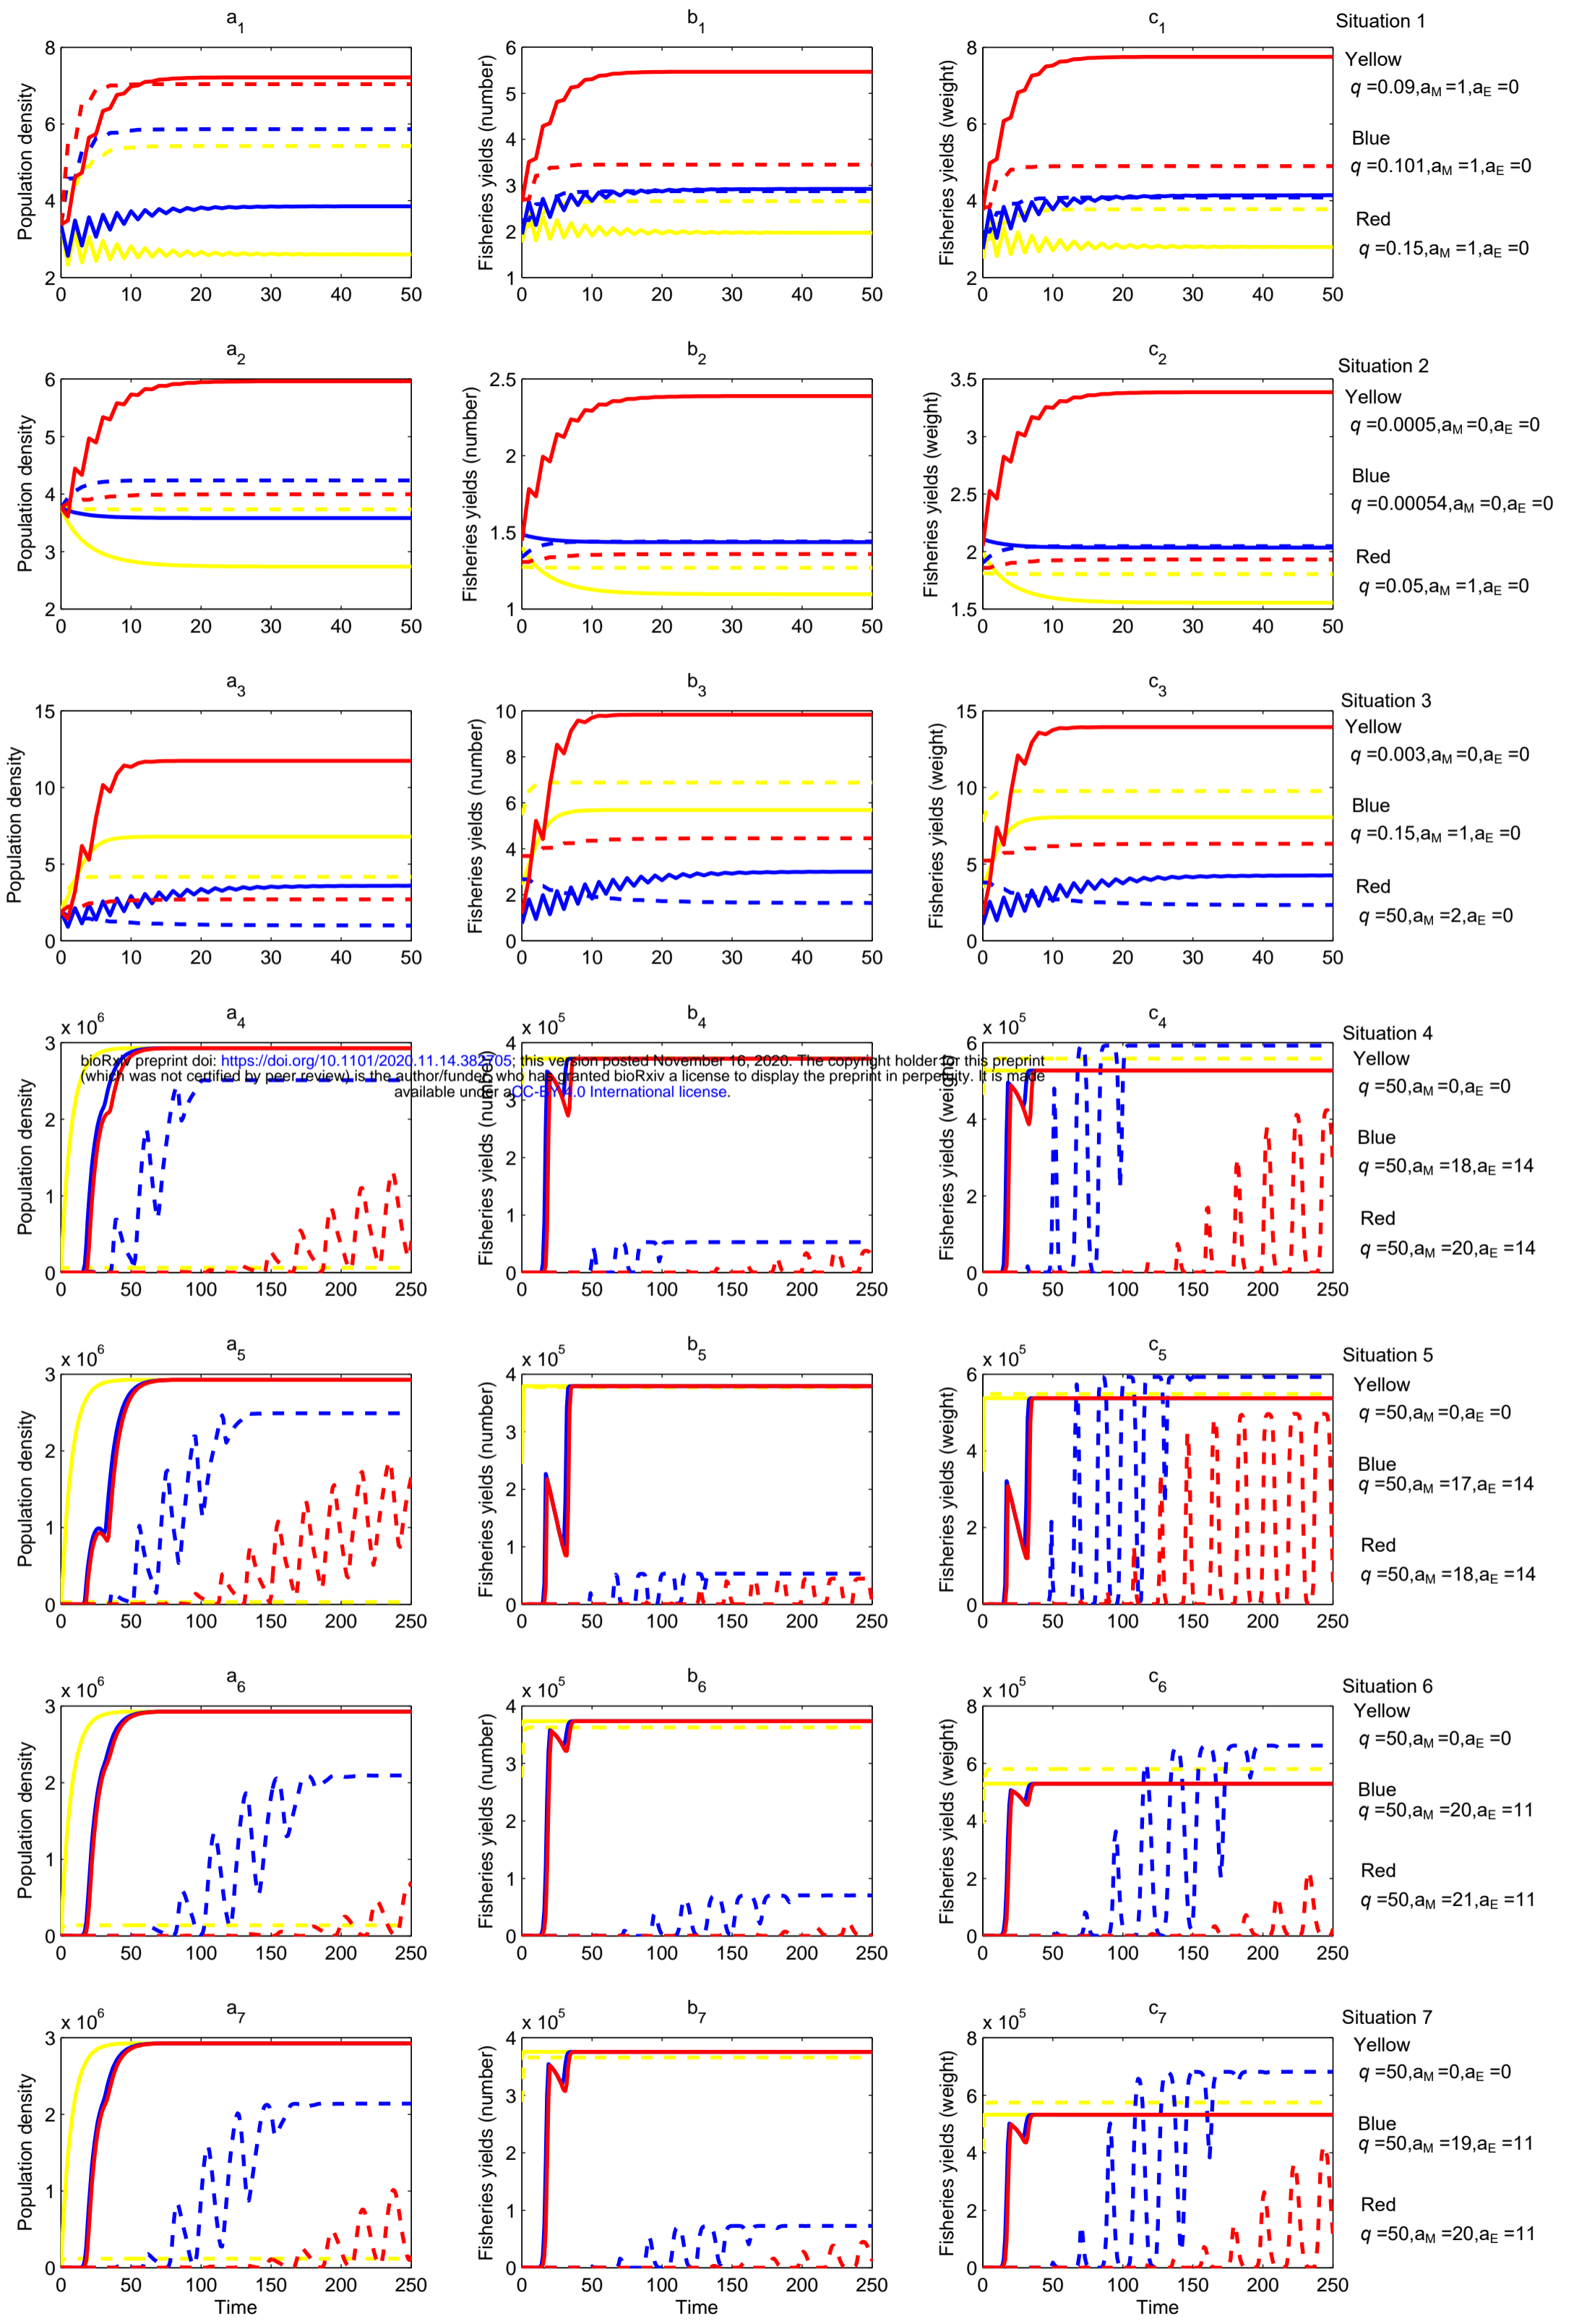

$q = 50$   
 $a_M = 0$   
 $a_E = 0$

$q = 50$   
 $a_M = 19$   
 $a_E = 11$

$q = 50$   
 $a_M = 20$   
 $a_E = 11$

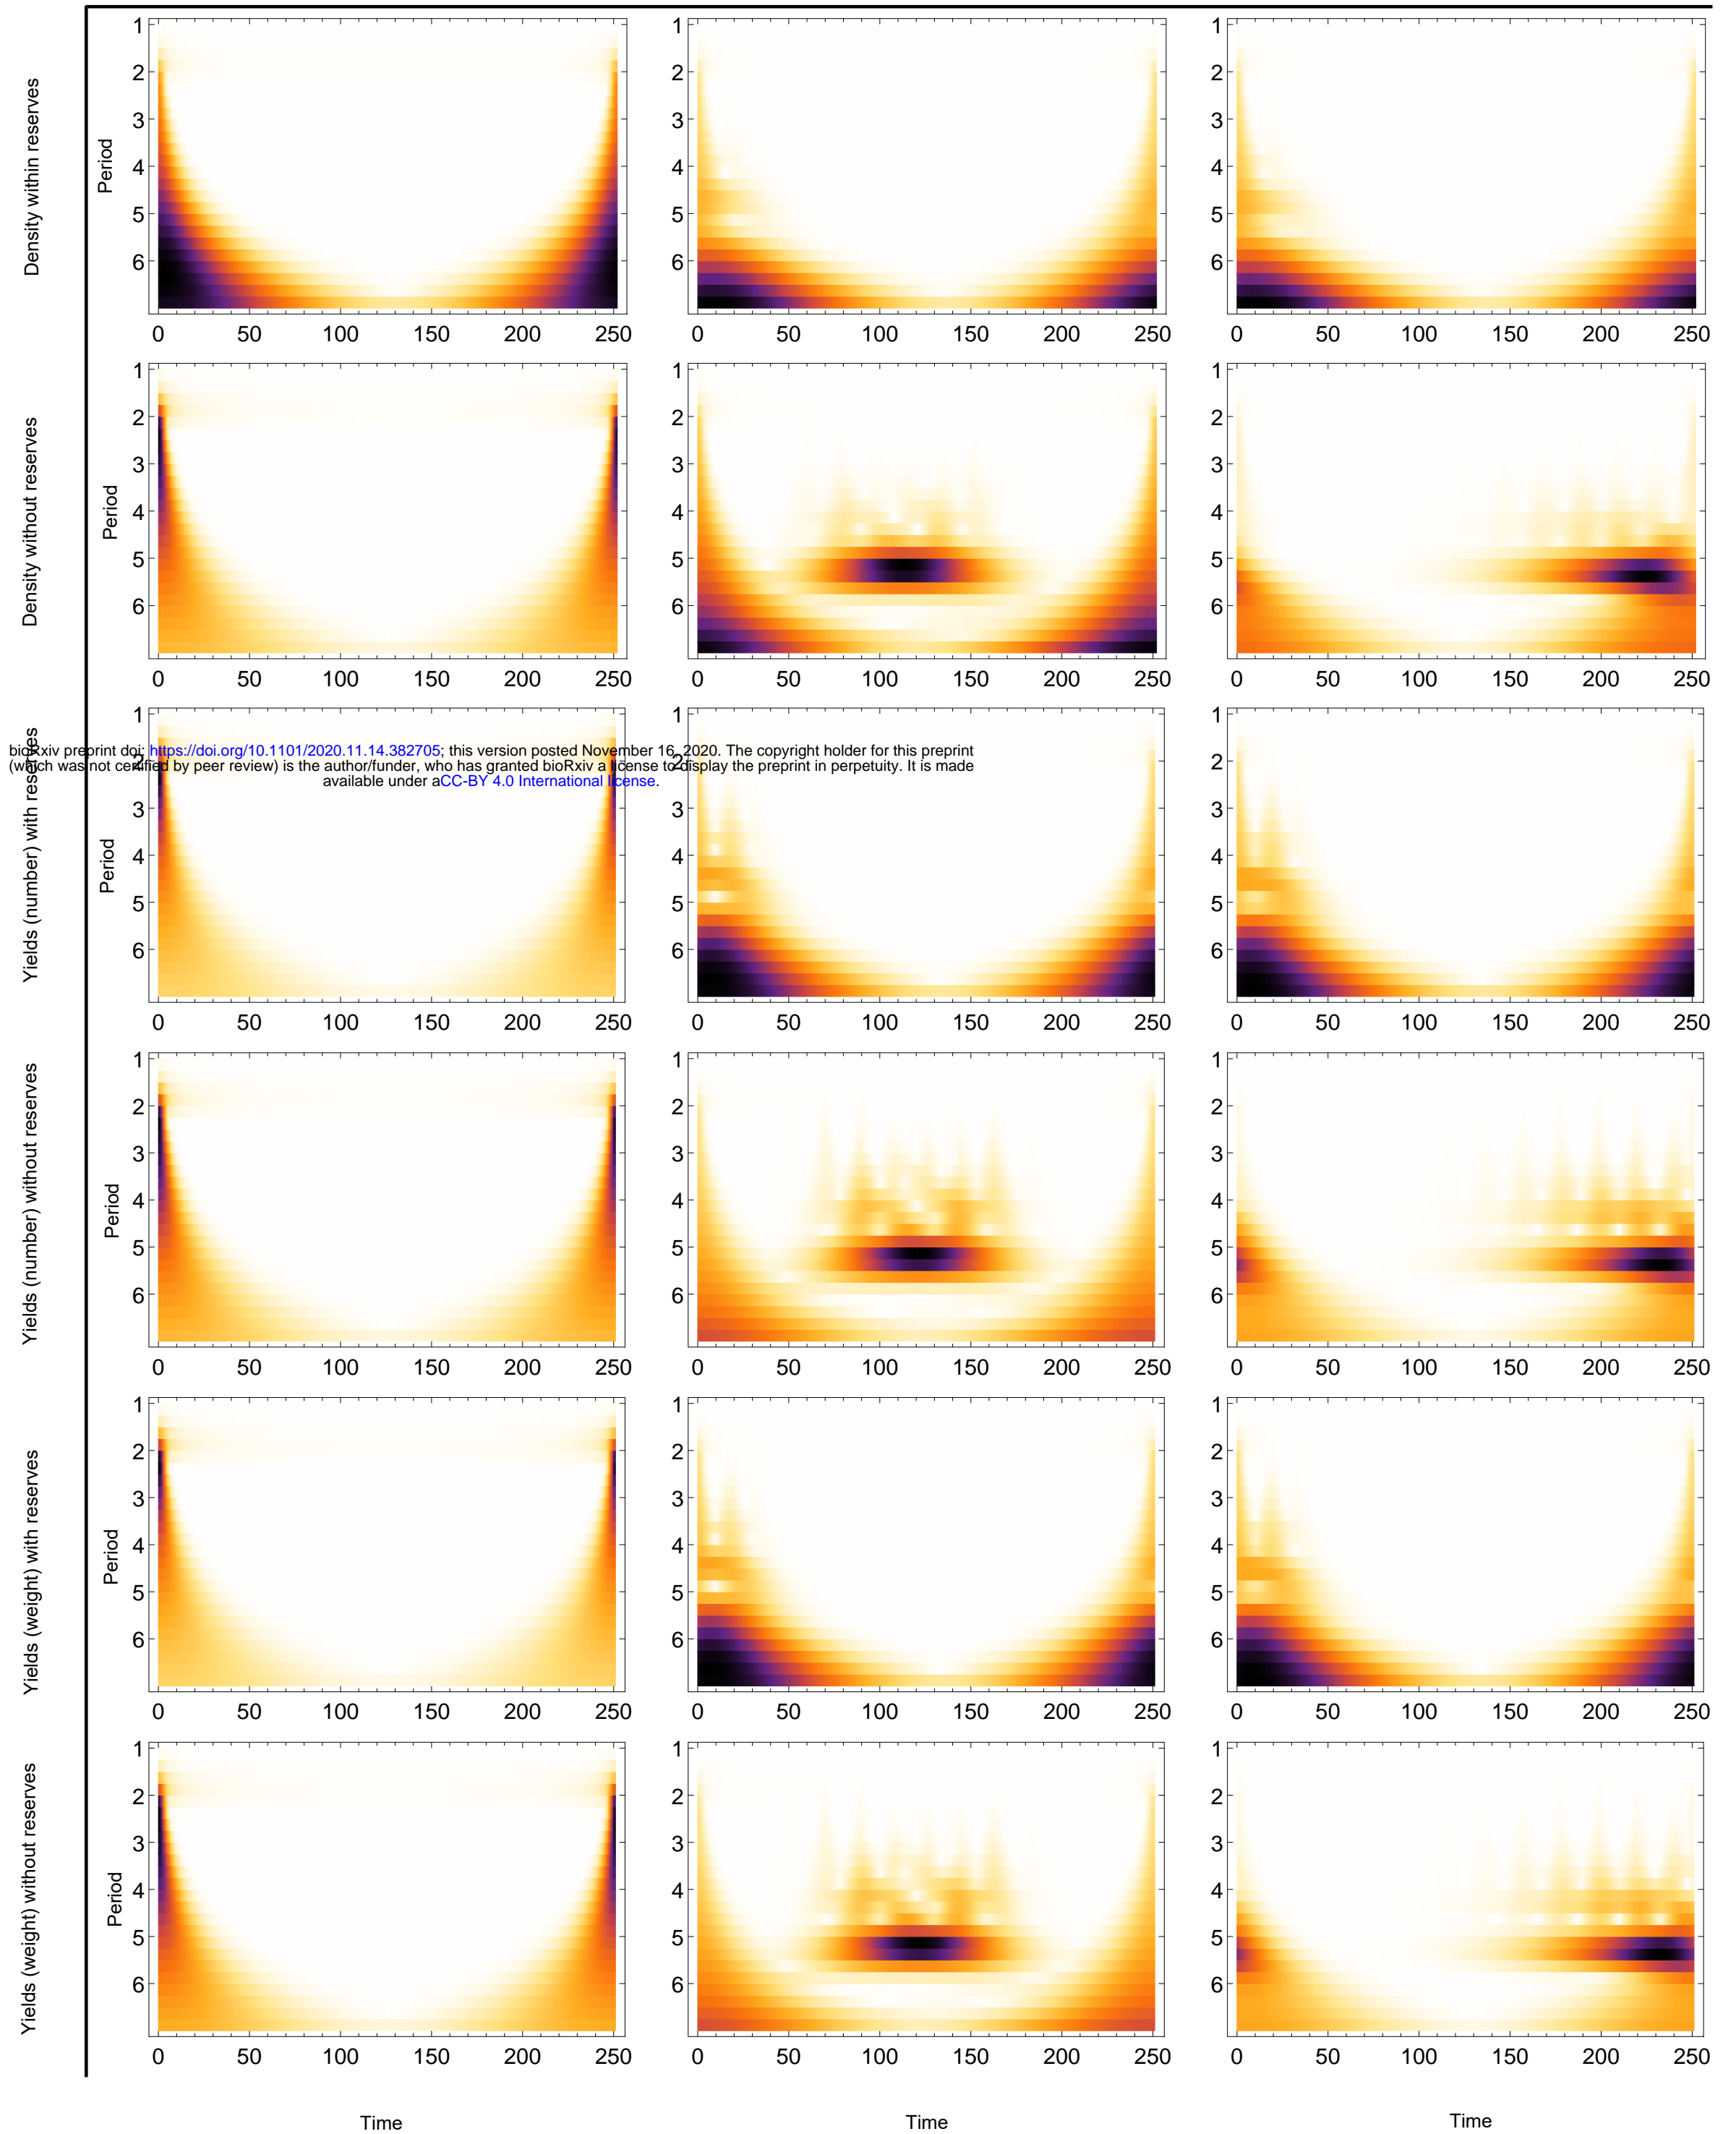

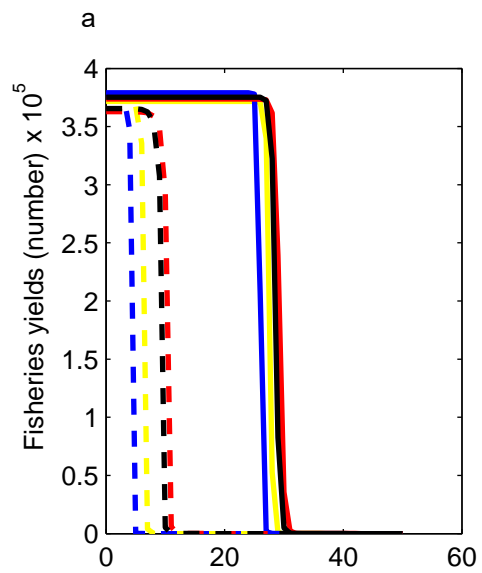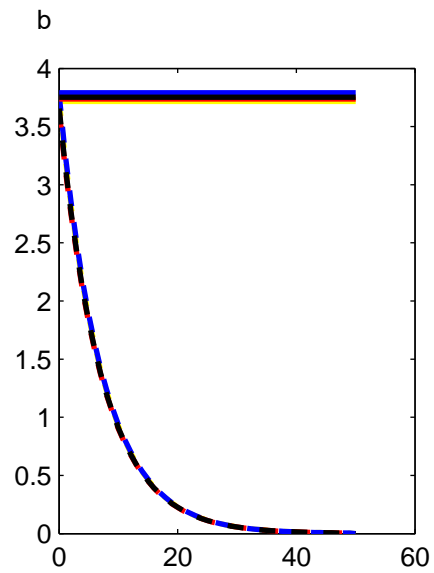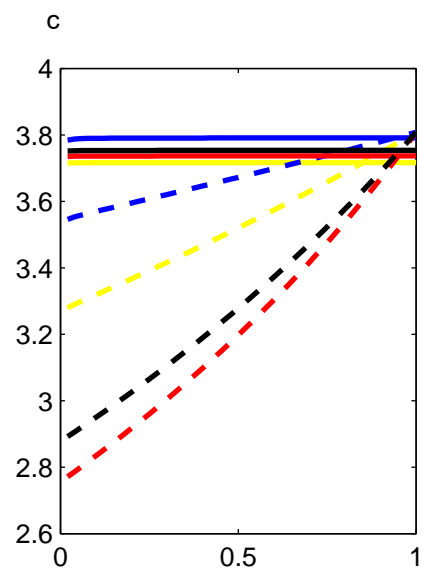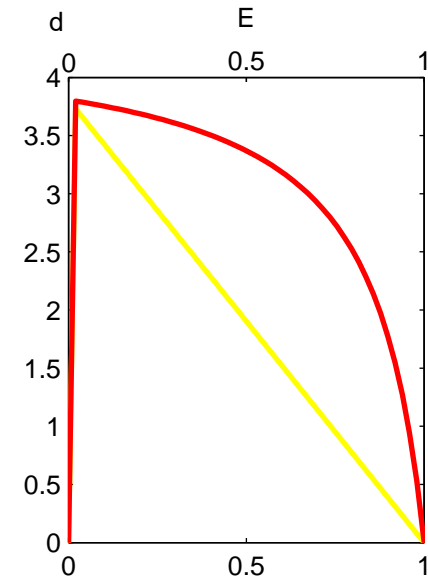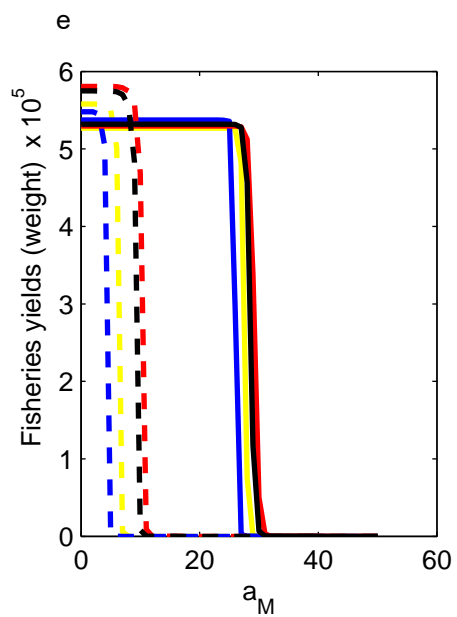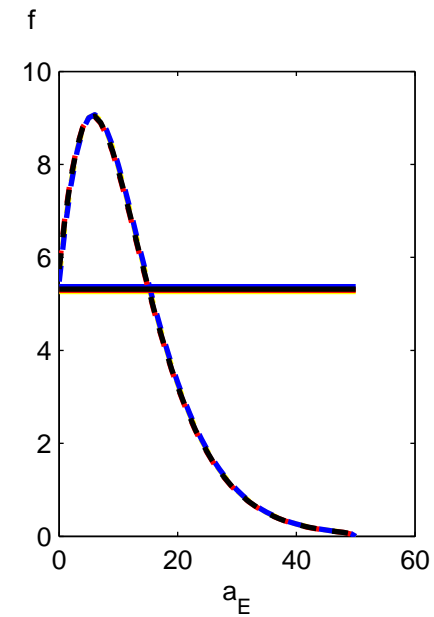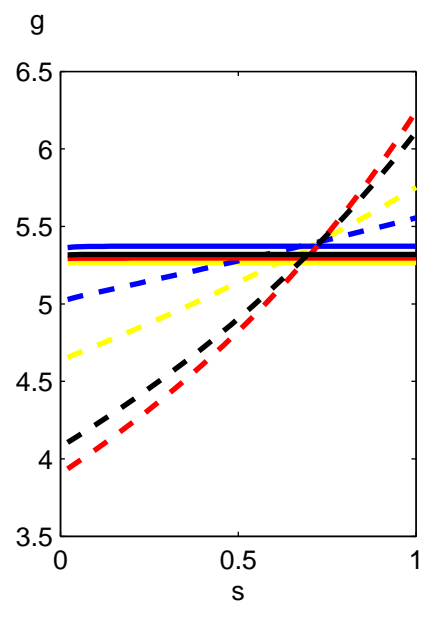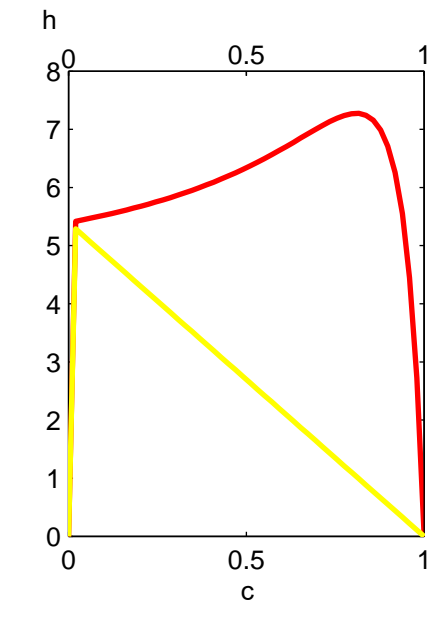



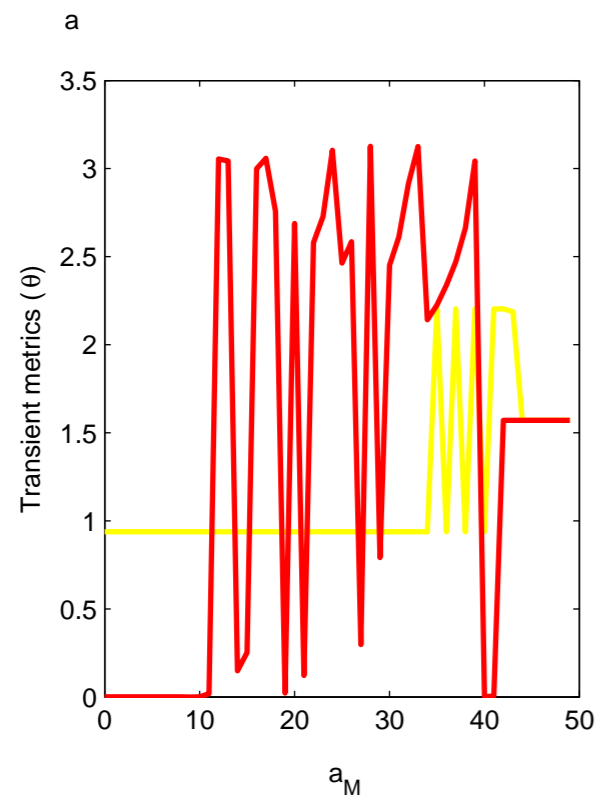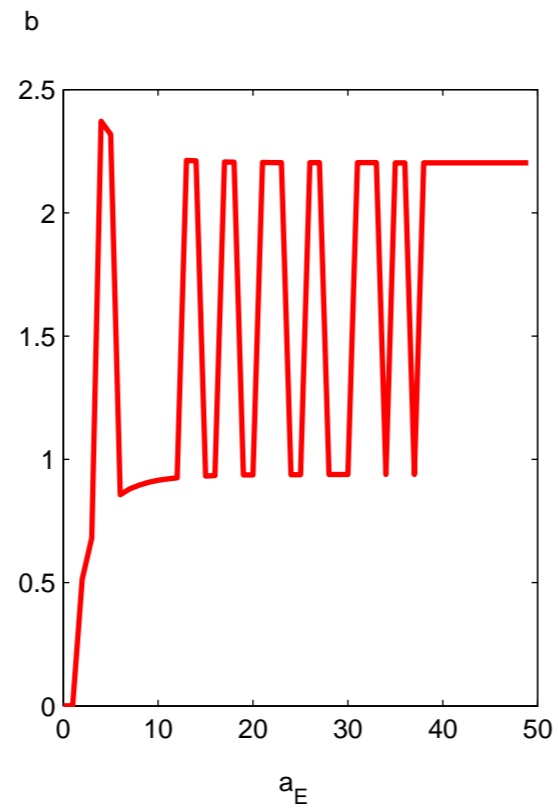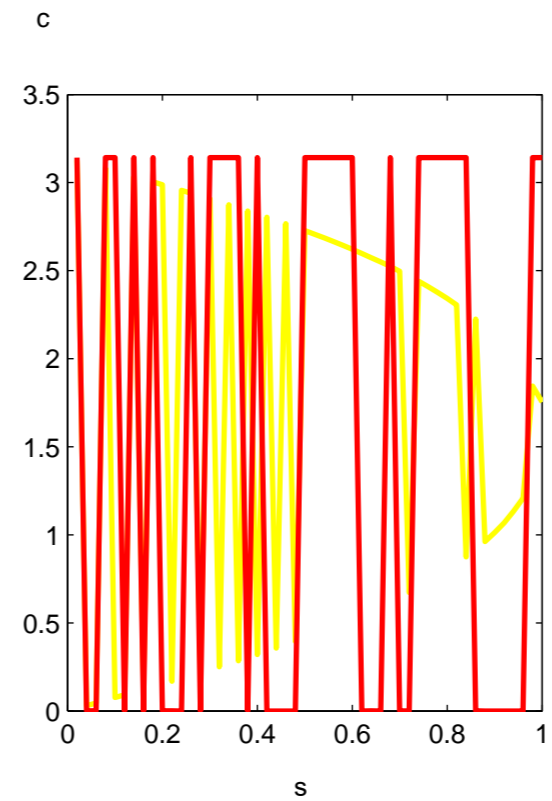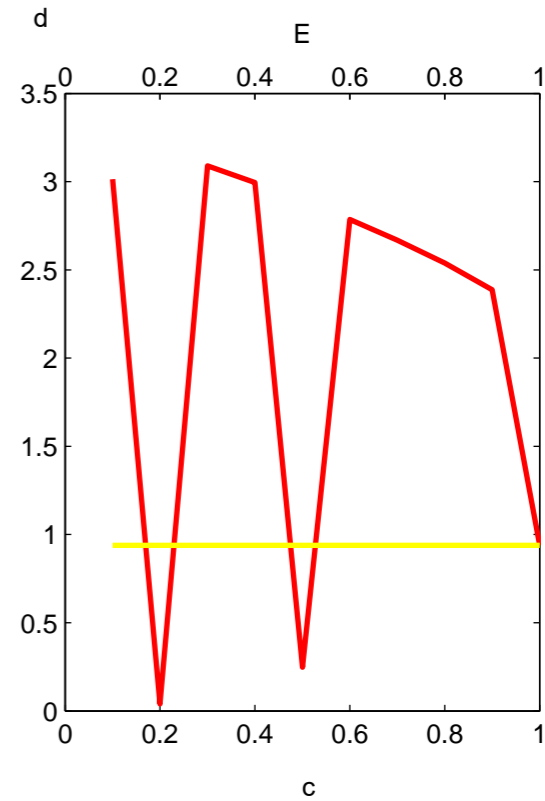

Source: https://www.biorxiv.org/content/10.1101/2020.11.14.382705v1.full.pdf
